# Supplementary material for: A Novel Approach for Dermal Application of Pranoprofen-Loaded Lipid Nanoparticles for the Treatment of Post-Tattoo Inflammatory Reactions
Source: MDPI journal article supplement (doi:10.3390/pharmaceutics16050643), 2024-05-10
Supplement: s1 [file s1]

# A Novel Approach for Dermal Application of Pranoprofen-Loaded Lipid Nanoparticles for the Treatment of Post-Tattoo Inflammatory Reactions

Guillermo De Grau-Bassal <sup>1,†</sup>, Mireia Mallandrich <sup>2,3,\*,†</sup>, Lilian Sosa <sup>4,5</sup>, Lupe Espinoza <sup>6</sup>, Ana Cristina Calpena <sup>2,3</sup>, Núria Bozal-de Febrer <sup>1</sup>, María J. Rodríguez-Lagunas <sup>7,8</sup>, María L. Garduño-Ramírez <sup>3,9</sup> and María Rincón <sup>3,10,\*</sup>

Tables S1 and S2 show the results of the kinetic modelling for the NLC-PRA and the plain solution, respectively. The best-fit model was selected based on the Akaike's Information Criterion (AIC), the lower AIC, the better the fit. For both formulations, the NLC-PRA and the PRA plain solution the first-order kinetic model was the one which best described the drug release process.

**Table S1.** Kinetic modelling for PRA released from the nanostructured formulation. Amax: maximum amount predicted by the model; Kd, Kt, Kk, Kh: drug release rate; n: drug release mechanism;  $\beta$ : shape factor and td: time necessary to release the 63.2 % of the drug.

| Kinetic Model    | Parameters     | Units           | Value<br>(Mean $\pm$ SD) |
|------------------|----------------|-----------------|--------------------------|
| Hyperbole        | Kd             | h               | 42.3 $\pm$ 7.4           |
|                  | Q $\infty$     | $\mu$ g         | 807.4 $\pm$ 70.9         |
|                  | R <sup>2</sup> | -               | 0.9735                   |
|                  | AIC            | -               | <b>93.66</b>             |
| First-order      | Kf             | h <sup>-1</sup> | 0.0305 $\pm$ 0.0038      |
|                  | Q $\infty$     | $\mu$ g         | 565.3 $\pm$ 34.5         |
|                  | R <sup>2</sup> | -               | 0.9736                   |
|                  | AIC            | -               | 93.60                    |
| Korsmeyer-Peppas | Kk             | h <sup>-n</sup> | 36.7 $\pm$ 6.3           |
|                  | n              | -               | 0.6273 $\pm$ 0.0463      |
|                  | R <sup>2</sup> | -               | 0.9547                   |
|                  | AIC            | -               | 98.47                    |
| Weibull          | td             | h               | 32.3 $\pm$ 6.9           |
|                  | $\beta$        | -               | 1.01 $\pm$ 0.12          |
|                  | Q $\infty$     | $\mu$ g         | 561.0 $\pm$ 58.1         |
|                  | R <sup>2</sup> | -               | 0.9736                   |
|                  | AIC            | -               | 95.60                    |
| Higuchi          | Kh             | h <sup>-1</sup> | 58.9 $\pm$ 1.9           |
|                  | R <sup>2</sup> | -               | 0.9329                   |
|                  | AIC            | -               | 100.01                   |

**Table S2.** Kinetic modelling for PRA from the plain solution. Amax: maximum amount predicted by the model; Kd, Kt, Kk, Kh: drug release rate; n: drug release mechanism;  $\beta$ : shape factor and td: time necessary to release the 63.2 % of the drug.

| Kinetic Model    | Parameters   | Units           | Value<br>(Mean $\pm$ SD) |
|------------------|--------------|-----------------|--------------------------|
| Hyperbole        | Kd           | h               | 0.2434 $\pm$ 0.0718      |
|                  | $Q_{\infty}$ | $\mu\text{g}$   | 201.4 $\pm$ 4.2          |
|                  | $R^2$        | -               | 0.9735                   |
|                  | AIC          | -               | 82.94                    |
| First-order      | Kf           | $\text{h}^{-1}$ | 1.558 $\pm$ 0.221        |
|                  | $Q_{\infty}$ | $\mu\text{g}$   | 197.9 $\pm$ 3.6          |
|                  | $R^2$        | -               | 0.9421                   |
|                  | <b>AIC</b>   | -               | <b>82.71</b>             |
| Korsmeyer-Peppas | Kk           | $\text{h}^{-n}$ | 173.3 $\pm$ 6.9          |
|                  | n            | -               | 0.0397 $\pm$ 0.0133      |
|                  | $R^2$        | -               | 0.9289                   |
|                  | AIC          | -               | 84.55                    |
| Weibull          | td           | h               | 0.6 $\pm$ 0.2            |
|                  | $\beta$      | -               | 0.79 $\pm$ 0.44          |
|                  | $Q_{\infty}$ | $\mu\text{g}$   | 198.3 $\pm$ 3.8          |
|                  | $R^2$        | -               | 0.9425                   |
|                  | AIC          | -               | 84.65                    |
| Higuchi          | Kh           | $\text{h}^{-1}$ | 33.9 $\pm$ 3.5           |
|                  | $R^2$        | -               | -0.8166                  |
|                  | AIC          | -               | 111.72                   |

**Equations S1–S5** describe the different kinetic models for drug release:

- Hyperbole model:

$$Q_t = \frac{Q_{\max} \times t}{K_d + t} \quad (\text{S1})$$

where,  $Q_t$  = cumulative percentage of drug release at time  $t$ ;  $Q_{\max}$  = maximum amount of drug release;  $K_d$  = time required to reach 50% drug release.

- First-order model:

$$Q_t = Q_{\infty} \times (1 - e^{-k_f \times t}) \quad (\text{S2})$$

where,  $Q_{\infty}$  = maximum amount of drug release;  $K_f$  = release rate constant.

- Korsmeyer-Peppas:

$$Q_t = K_k \times t^n \quad (\text{S3})$$

where,  $K_k$  = release rate constant;  $n$  = release exponent.

- Weibull:

$$Q_t = Q_{\infty} \times \left[ 1 - e^{-(t/t_d)^{\beta}} \right] \quad (\text{S4})$$

where,  $\beta$  = shape factor and  $t_d$  = time necessary to release the 63.2 % of the drug.

- Higuchi:

$$Q_t = K_H \times t^{1/2} \quad (\text{S5})$$

where,  $K_H$  = release rate constant.
